# Supplementary material for: Ethylene–4-methyl-1-pentene copolymers of complex chain architecture using α-diimine Ni(ii) catalysts: synthesis, 13C NMR assignment and understanding the chain-walking mechanism
Source: Royal Society of Chemistry journal article supplement (doi:10.1039/c3py01508d), 2013-11-29
Supplement: c3py01508d.pdf [file c3py01508d.pdf]

Cite this: DOI: 10.1039/c0xx00000x

www.rsc.org/xxxxxx

**ARTICLE TYPE**

# Ethylene/4-methyl-1-pentene copolymers of complex chain architectures by $\alpha$ -diimine Ni(II) catalysts: synthesis, $^{13}\text{C}$ NMR assignment and understanding the chain-walking mechanism

Simona Losio\*, Giuseppe Leone, Fabio Bertini, Giovanni Ricci, Maria Carmela Sacchi and Antonella Caterina Boccia\*

Received (in XXX, XXX) Xth XXXXXXXXXX 20XX, Accepted Xth XXXXXXXXXX 20XX

DOI: 10.1039/b000000x

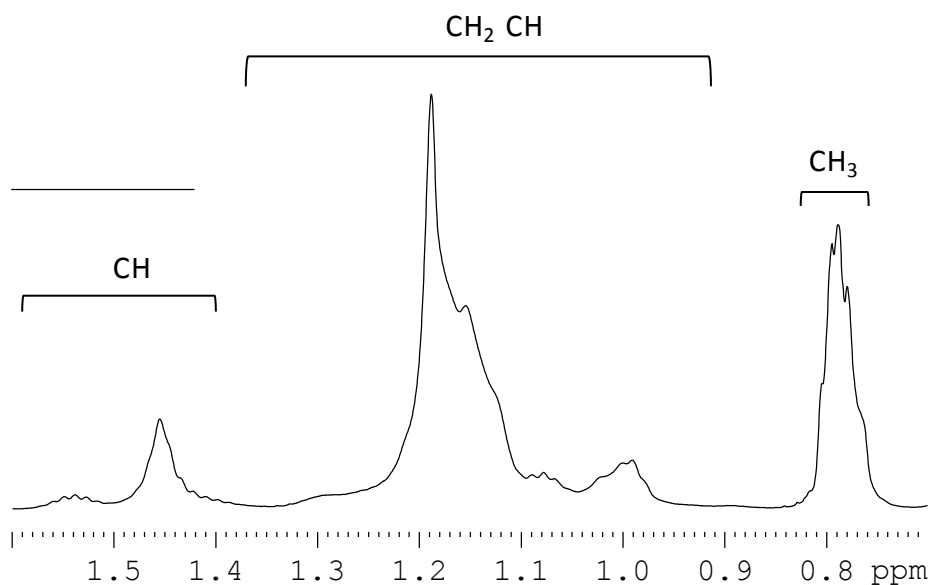

Figure S1.  $^1\text{H}$  NMR spectrum of E/4M1P copolymer (run 6 in Table 1)



Cite this: DOI: 10.1039/c0xx00000x

www.rsc.org/xxxxxx

ARTICLE TYPE

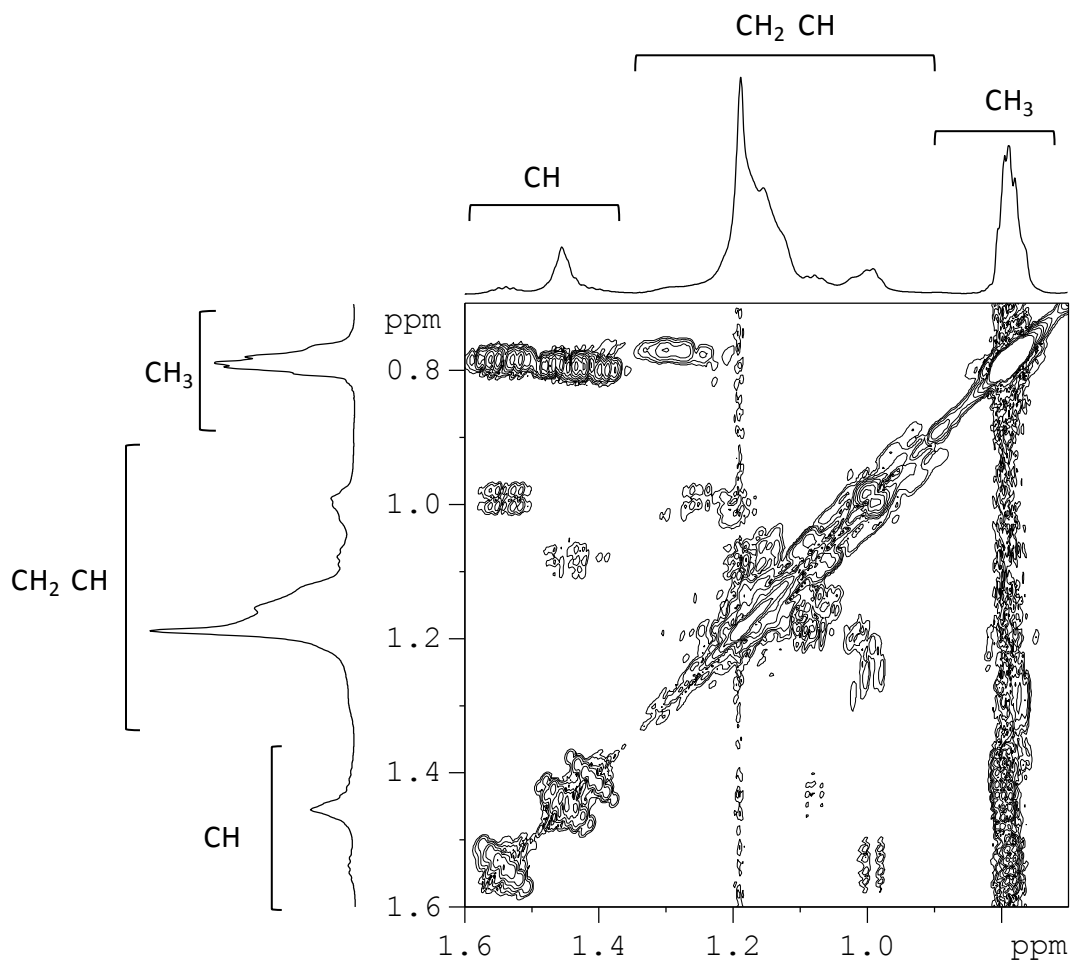

Figure S2.  $^1\text{H}$ - $^1\text{H}$  COSY spectrum of E/4MIP copolymer (run 6 in Table 1).



Cite this: DOI: 10.1039/c0xx00000x

www.rsc.org/xxxxxx

ARTICLE TYPE

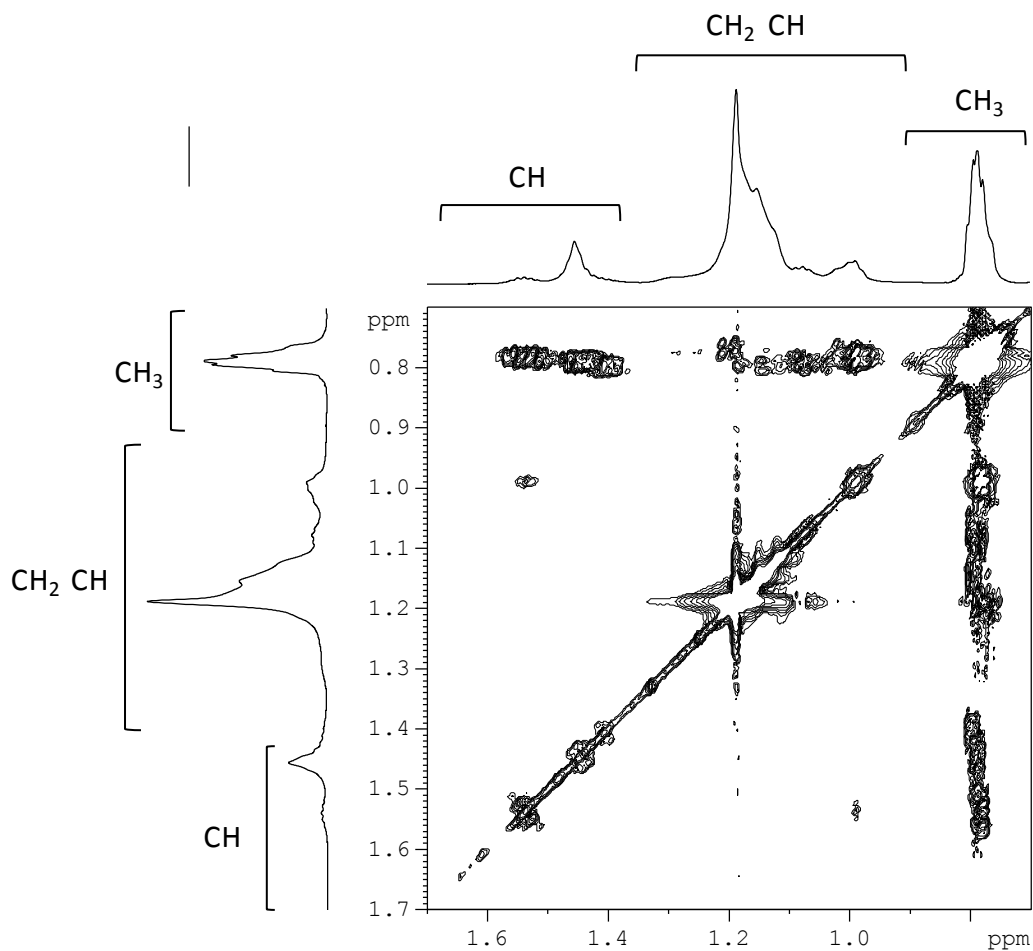

Figure S3.  $^1\text{H}$ - $^1\text{H}$  TOCSY spectrum of E/4M1P copolymer (run 6 in Table 1).



Cite this: DOI: 10.1039/c0xx00000x

www.rsc.org/xxxxxx

ARTICLE TYPE

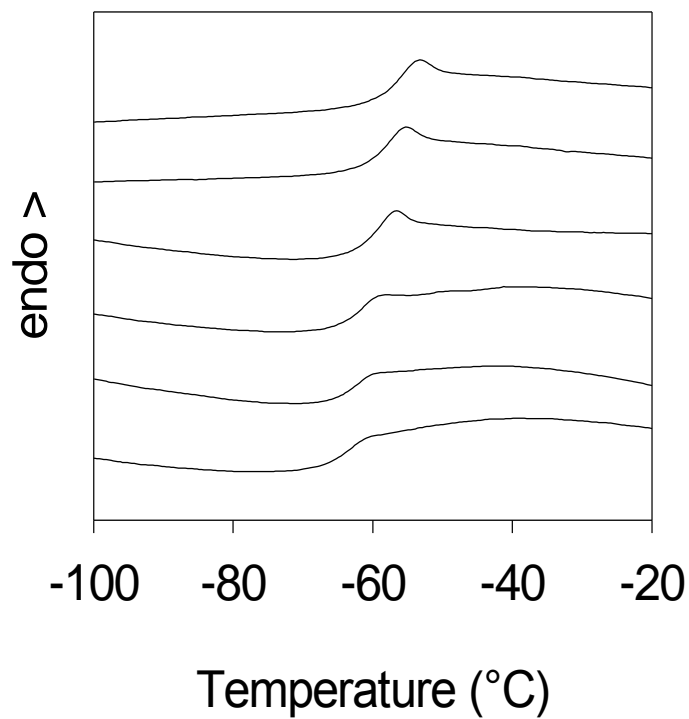

Figure S4.  $T_g$  plots for runs 1-6

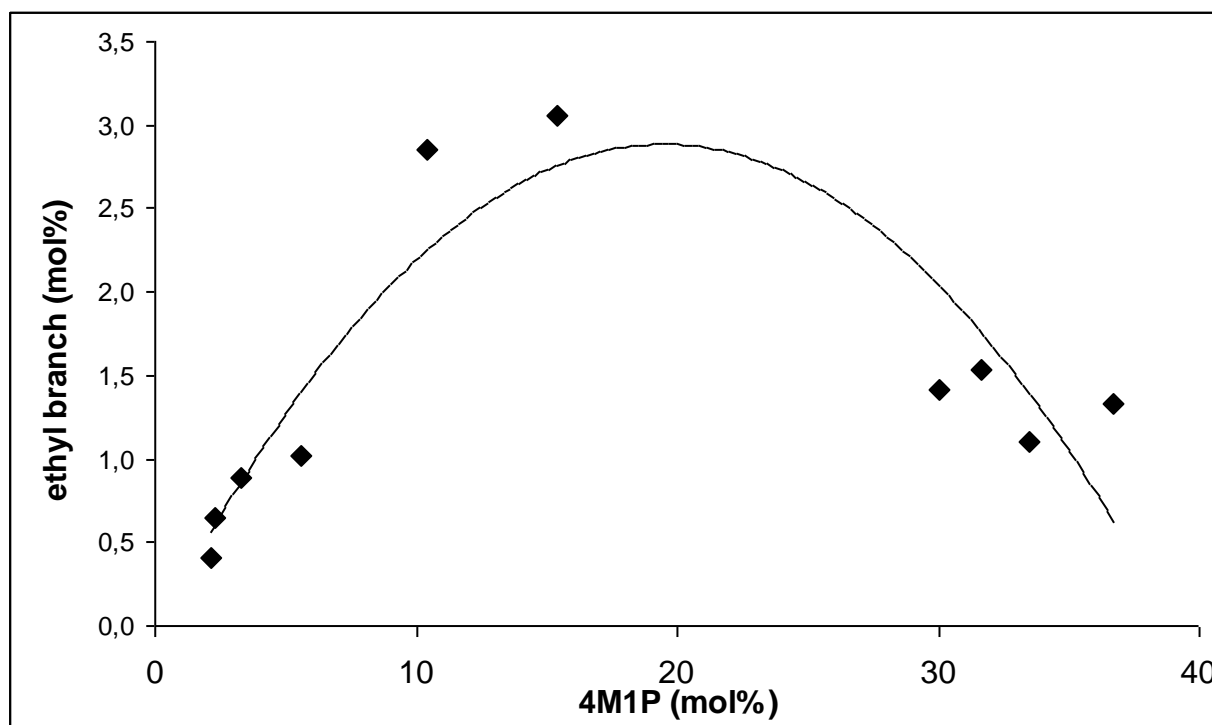

Figure S5. Ethyl branches distribution





Cite this: DOI: 10.1039/c0xx00000x

www.rsc.org/xxxxxx

ARTICLE TYPE

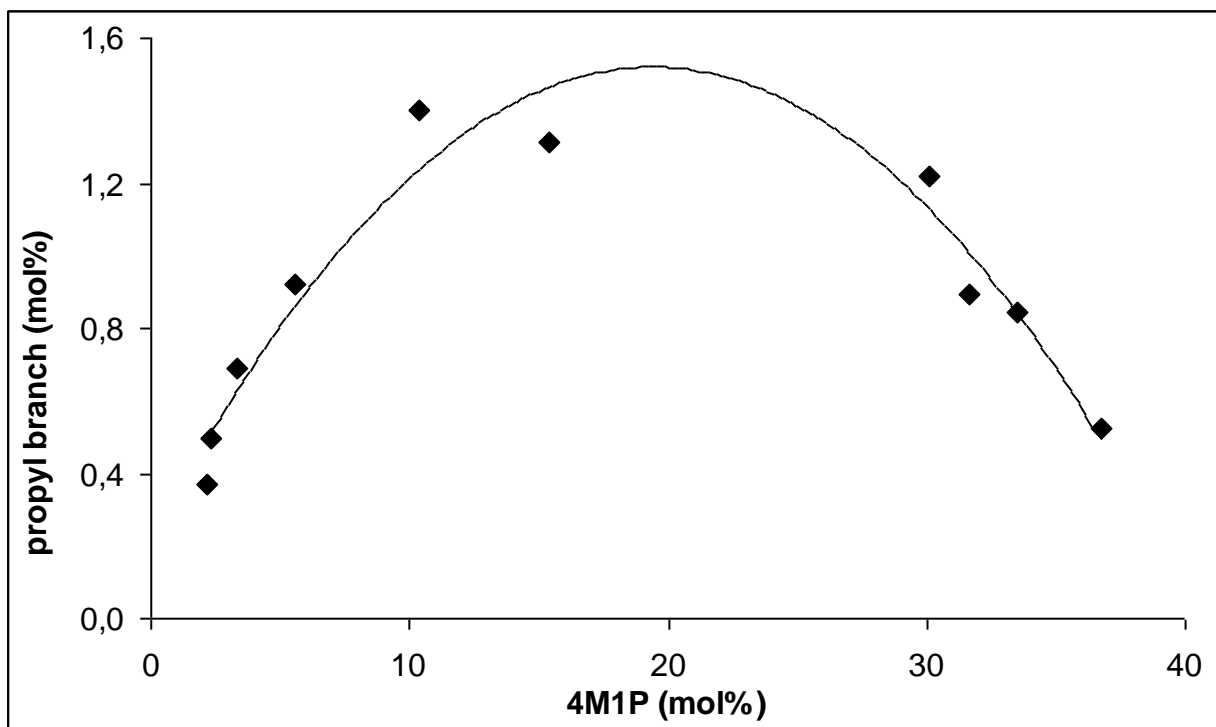

Figure S6. Propyl branches distribution

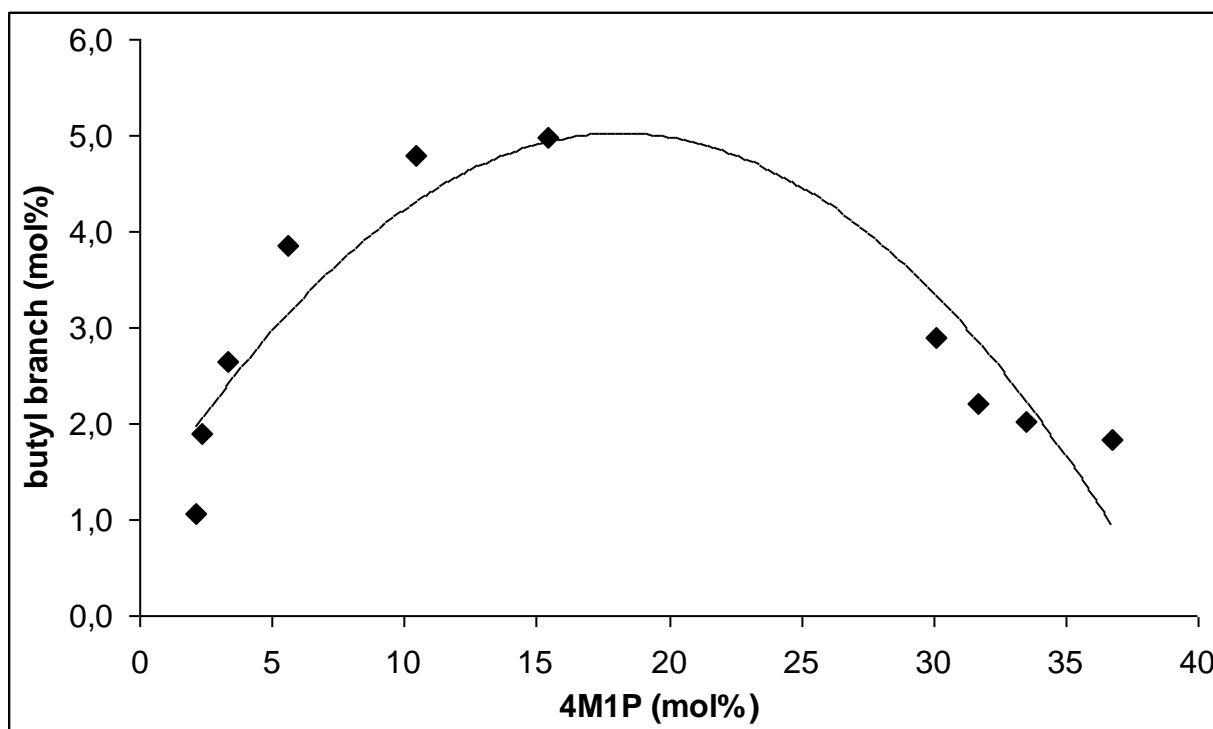

Figure S7. Butyl branches distribution
